# Supplementary material for: Identification of Whole-Serum Glycobiomarkers for Colorectal Carcinoma Using Reverse-Phase Lectin Microarray
Source: PubMed Central journal article supplement (PMC8695905; doi:10.3389/fonc.2021.735338), 2021-12-09
Supplement: DataSheet_1.pdf [file DataSheet_1.pdf]

| hY vs. hO           | AUC   | AUC left | AUC right | Spec  | Sens | Acc   |  | hO vs. CRC          | AUC   | AUC left | AUC right | Spec  | Sens | Acc   |  | AUC <sub>age</sub> /AUC <sub>CRC</sub> |
|---------------------|-------|----------|-----------|-------|------|-------|--|---------------------|-------|----------|-----------|-------|------|-------|--|----------------------------------------|
| 1 ~ AAL             | 0.667 | 0.333    | 1         | 0.667 | 0.9  | 0.754 |  | 1 ~ AAL             | 0.689 | 0.467    | 0.894     | 0.778 | 0.7  | 0.75  |  | 0.968                                  |
| 2 ~ ConA            | 0.783 | 0.483    | 1         | 0.667 | 0.9  | 0.754 |  | 2 ~ ConA            | 0.444 | 0.233    | 0.667     | 0.667 | 0.5  | 0.607 |  | 1.764                                  |
| 3 ~ DBA             | 0.8   | 0.533    | 1         | 1     | 0.7  | 0.888 |  | 3 ~ DBA             | 0.839 | 0.661    | 0.978     | 0.722 | 0.9  | 0.786 |  | 0.954                                  |
| 4 ~ HPyL            | 0.483 | 0.183    | 0.783     | 0.667 | 0.5  | 0.604 |  | 4 ~ HPyL            | 0.711 | 0.461    | 0.922     | 0.889 | 0.6  | 0.786 |  | 0.679                                  |
| 5 ~ MAA             | 0.767 | 0.467    | 0.967     | 1     | 0.5  | 0.813 |  | 5 ~ MAA             | 0.728 | 0.528    | 0.894     | 0.556 | 1    | 0.714 |  | 1.054                                  |
| 6 ~ PHAE            | 0.617 | 0.267    | 0.933     | 0.5   | 0.9  | 0.65  |  | 6 ~ PHAE            | 0.939 | 0.833    | 1         | 0.944 | 0.9  | 0.929 |  | 0.657                                  |
| 7 ~ PHAL            | 0.55  | 0.267    | 0.833     | 0.833 | 0.5  | 0.708 |  | 7 ~ PHAL            | 0.622 | 0.383    | 0.867     | 0.778 | 0.7  | 0.75  |  | 0.884                                  |
| 8 ~ RCA I           | 0.6   | 0.3      | 0.867     | 1     | 0.4  | 0.775 |  | 8 ~ RCA I           | 0.811 | 0.606    | 0.967     | 0.833 | 0.7  | 0.786 |  | 0.74                                   |
| 9 ~ SNA I           | 0.95  | 0.833    | 1         | 1     | 0.8  | 0.925 |  | 9 ~ SNA I           | 0.783 | 0.589    | 0.944     | 0.778 | 0.8  | 0.786 |  | 1.213                                  |
| 10 ~ WFL            | 0.717 | 0.4      | 0.95      | 0.5   | 1    | 0.688 |  | 10 ~ WFL            | 0.544 | 0.311    | 0.756     | 0.278 | 1    | 0.536 |  | 1.318                                  |
| 11 ~ WGA            | 0.883 | 0.683    | 1         | 0.833 | 0.9  | 0.858 |  | 11 ~ WGA            | 0.906 | 0.756    | 1         | 0.944 | 0.8  | 0.893 |  | 0.975                                  |
| 12 ~ RPL-Fuc1       | 0.6   | 0.267    | 0.9       | 0.5   | 0.8  | 0.613 |  | 12 ~ RPL-Fuc1       | 0.717 | 0.517    | 0.883     | 0.556 | 0.9  | 0.679 |  | 0.837                                  |
| 13 ~ RPL-Sia2       | 0.583 | 0.25     | 0.867     | 0.667 | 0.6  | 0.642 |  | 13 ~ RPL-Sia2       | 0.717 | 0.489    | 0.917     | 0.944 | 0.5  | 0.786 |  | 0.813                                  |
| 14 ~ P sel          | 0.617 | 0.317    | 0.884     | 0.833 | 0.6  | 0.746 |  | 14 ~ P sel          | 0.639 | 0.4      | 0.861     | 0.944 | 0.4  | 0.75  |  | 0.966                                  |
| 15 ~ HL sel         | 0.6   | 0.3      | 0.867     | 0.833 | 0.5  | 0.708 |  | 15 ~ HL sel         | 0.889 | 0.739    | 0.989     | 0.944 | 0.7  | 0.857 |  | 0.675                                  |
| 16 ~ HE sel         | 0.7   | 0.433    | 0.933     | 1     | 0.5  | 0.813 |  | 16 ~ HE sel         | 0.817 | 0.617    | 0.967     | 0.722 | 0.9  | 0.786 |  | 0.857                                  |
| 17 ~ AAL + ConA     | 0.917 | 0.733    | 1         | 0.833 | 0.9  | 0.858 |  | 17 ~ AAL + ConA     | 0.717 | 0.517    | 0.911     | 0.778 | 0.7  | 0.75  |  | 1.279                                  |
| 18 ~ AAL + DBA      | 0.767 | 0.5      | 1         | 0.833 | 0.8  | 0.821 |  | 18 ~ AAL + DBA      | 0.833 | 0.65     | 0.978     | 0.944 | 0.7  | 0.857 |  | 0.921                                  |
| 19 ~ AAL + HPyL     | 0.617 | 0.267    | 0.917     | 0.667 | 0.7  | 0.679 |  | 19 ~ AAL + HPyL     | 0.722 | 0.472    | 0.922     | 0.833 | 0.7  | 0.786 |  | 0.855                                  |
| 20 ~ AAL + MAA      | 0.85  | 0.6      | 1         | 1     | 0.7  | 0.888 |  | 20 ~ AAL + MAA      | 0.7   | 0.494    | 0.889     | 0.556 | 0.9  | 0.679 |  | 1.214                                  |
| 21 ~ AAL + PHAE     | 0.75  | 0.467    | 0.95      | 1     | 0.5  | 0.813 |  | 21 ~ AAL + PHAE     | 0.972 | 0.9      | 1         | 0.944 | 0.9  | 0.929 |  | 0.772                                  |
| 22 ~ AAL + PHAL     | 0.65  | 0.3      | 1         | 0.667 | 0.9  | 0.754 |  | 22 ~ AAL + PHAL     | 0.711 | 0.483    | 0.906     | 0.778 | 0.8  | 0.786 |  | 0.914                                  |
| 23 ~ AAL + RCA I    | 0.8   | 0.517    | 1         | 0.833 | 0.8  | 0.821 |  | 23 ~ AAL + RCA I    | 0.811 | 0.617    | 0.967     | 0.833 | 0.8  | 0.821 |  | 0.986                                  |
| 24 ~ AAL + SNA I    | 0.933 | 0.783    | 1         | 1     | 0.8  | 0.925 |  | 24 ~ AAL + SNA I    | 0.733 | 0.506    | 0.917     | 0.778 | 0.8  | 0.786 |  | 1.273                                  |
| 25 ~ AAL + WFL      | 0.933 | 0.75     | 1         | 1     | 0.9  | 0.963 |  | 25 ~ AAL + WFL      | 0.667 | 0.444    | 0.872     | 0.778 | 0.7  | 0.75  |  | 1.399                                  |
| 26 ~ AAL + WGA      | 0.95  | 0.8      | 1         | 0.833 | 1    | 0.896 |  | 26 ~ AAL + WGA      | 0.911 | 0.767    | 1         | 0.944 | 0.8  | 0.893 |  | 1.043                                  |
| 27 ~ AAL + RPL-Fuc1 | 0.667 | 0.35     | 0.933     | 0.833 | 0.6  | 0.746 |  | 27 ~ AAL + RPL-Fuc1 | 0.722 | 0.517    | 0.894     | 0.611 | 0.9  | 0.714 |  | 0.924                                  |
| 28 ~ AAL + RPL-Sia2 | 0.75  | 0.433    | 1         | 0.667 | 0.9  | 0.754 |  | 28 ~ AAL + RPL-Sia2 | 0.722 | 0.489    | 0.911     | 0.889 | 0.6  | 0.786 |  | 1.039                                  |
| 29 ~ AAL + P sel    | 0.667 | 0.4      | 0.917     | 1     | 0.5  | 0.813 |  | 29 ~ AAL + P sel    | 0.711 | 0.494    | 0.894     | 0.889 | 0.5  | 0.75  |  | 0.938                                  |
| 30 ~ AAL + HL sel   | 0.6   | 0.3      | 0.883     | 0.667 | 0.6  | 0.642 |  | 30 ~ AAL + HL sel   | 0.911 | 0.778    | 1         | 0.833 | 0.9  | 0.857 |  | 0.659                                  |
| 31 ~ AAL + HE sel   | 0.717 | 0.433    | 0.983     | 0.833 | 0.7  | 0.783 |  | 31 ~ AAL + HE sel   | 0.811 | 0.606    | 0.967     | 0.722 | 0.9  | 0.786 |  | 0.884                                  |
| 32 ~ ConA + DBA     | 0.85  | 0.633    | 1         | 0.667 | 0.9  | 0.754 |  | 32 ~ ConA + DBA     | 0.839 | 0.655    | 0.978     | 0.833 | 0.8  | 0.821 |  | 1.013                                  |
| 33 ~ ConA + HPyL    | 0.783 | 0.466    | 1         | 0.667 | 1    | 0.792 |  | 33 ~ ConA + HPyL    | 0.722 | 0.467    | 0.939     | 0.833 | 0.7  | 0.786 |  | 1.084                                  |
| 34 ~ ConA + MAA     | 0.867 | 0.65     | 1         | 1     | 0.6  | 0.85  |  | 34 ~ ConA + MAA     | 0.722 | 0.517    | 0.9       | 0.556 | 1    | 0.714 |  | 1.201                                  |
| 35 ~ ConA + PHAE    | 0.817 | 0.567    | 1         | 0.667 | 0.9  | 0.754 |  | 35 ~ ConA + PHAE    | 0.944 | 0.833    | 1         | 0.944 | 0.9  | 0.929 |  | 0.865                                  |

|    |                   |       |       |       |       |     |       |  |    |                   |       |       |       |       |     |       |  |       |
|----|-------------------|-------|-------|-------|-------|-----|-------|--|----|-------------------|-------|-------|-------|-------|-----|-------|--|-------|
| 36 | ~ ConA + PHAL     | 0.783 | 0.5   | 1     | 0.833 | 0.7 | 0.783 |  | 36 | ~ ConA + PHAL     | 0.667 | 0.411 | 0.9   | 0.833 | 0.7 | 0.786 |  | 1.174 |
| 37 | ~ ConA + RCA I    | 0.833 | 0.567 | 1     | 0.667 | 0.9 | 0.754 |  | 37 | ~ ConA + RCA I    | 0.822 | 0.633 | 0.967 | 0.833 | 0.8 | 0.821 |  | 1.013 |
| 38 | ~ ConA + SNA I    | 0.95  | 0.8   | 1     | 0.833 | 1   | 0.896 |  | 38 | ~ ConA + SNA I    | 0.789 | 0.6   | 0.944 | 0.833 | 0.8 | 0.821 |  | 1.204 |
| 39 | ~ ConA + WFL      | 0.867 | 0.633 | 1     | 0.833 | 0.8 | 0.821 |  | 39 | ~ ConA + WFL      | 0.439 | 0.228 | 0.667 | 0.444 | 0.7 | 0.536 |  | 1.975 |
| 40 | ~ ConA + WGA      | 0.883 | 0.667 | 1     | 1     | 0.8 | 0.925 |  | 40 | ~ ConA + WGA      | 0.922 | 0.794 | 1     | 0.833 | 0.9 | 0.857 |  | 0.958 |
| 41 | ~ ConA + RPL-Fuc1 | 0.833 | 0.567 | 1     | 0.667 | 1   | 0.792 |  | 41 | ~ ConA + RPL-Fuc1 | 0.75  | 0.556 | 0.917 | 0.722 | 0.8 | 0.75  |  | 1.111 |
| 42 | ~ ConA + RPL-Sia2 | 0.817 | 0.533 | 1     | 0.667 | 1   | 0.792 |  | 42 | ~ ConA + RPL-Sia2 | 0.7   | 0.461 | 0.906 | 1     | 0.4 | 0.786 |  | 1.167 |
| 43 | ~ ConA + P sel    | 0.8   | 0.533 | 1     | 0.667 | 0.9 | 0.754 |  | 43 | ~ ConA + P sel    | 0.672 | 0.433 | 0.867 | 0.778 | 0.6 | 0.714 |  | 1.19  |
| 44 | ~ ConA + HL sel   | 0.8   | 0.517 | 1     | 0.667 | 0.9 | 0.754 |  | 44 | ~ ConA + HL sel   | 0.894 | 0.744 | 0.994 | 0.944 | 0.7 | 0.857 |  | 0.895 |
| 45 | ~ ConA + HE sel   | 0.817 | 0.533 | 1     | 0.667 | 1   | 0.792 |  | 45 | ~ ConA + HE sel   | 0.822 | 0.611 | 0.978 | 0.722 | 0.9 | 0.786 |  | 0.994 |
| 46 | ~ DBA + HPyL      | 0.783 | 0.5   | 1     | 0.667 | 0.9 | 0.754 |  | 46 | ~ DBA + HPyL      | 0.806 | 0.594 | 0.972 | 0.889 | 0.8 | 0.857 |  | 0.971 |
| 47 | ~ DBA + MAA       | 0.833 | 0.583 | 1     | 0.667 | 0.9 | 0.754 |  | 47 | ~ DBA + MAA       | 0.817 | 0.633 | 0.972 | 0.833 | 0.8 | 0.821 |  | 1.02  |
| 48 | ~ DBA + PHAE      | 0.783 | 0.533 | 0.967 | 1     | 0.5 | 0.813 |  | 48 | ~ DBA + PHAE      | 0.95  | 0.85  | 1     | 0.944 | 0.9 | 0.929 |  | 0.824 |
| 49 | ~ DBA + PHAL      | 0.783 | 0.517 | 0.983 | 0.833 | 0.7 | 0.783 |  | 49 | ~ DBA + PHAL      | 0.833 | 0.661 | 0.972 | 0.778 | 0.9 | 0.821 |  | 0.94  |
| 50 | ~ DBA + RCA I     | 0.8   | 0.533 | 1     | 1     | 0.7 | 0.888 |  | 50 | ~ DBA + RCA I     | 0.878 | 0.706 | 1     | 0.944 | 0.8 | 0.893 |  | 0.911 |
| 51 | ~ DBA + SNA I     | 0.95  | 0.816 | 1     | 1     | 0.8 | 0.925 |  | 51 | ~ DBA + SNA I     | 0.828 | 0.639 | 0.972 | 0.833 | 0.8 | 0.821 |  | 1.147 |
| 52 | ~ DBA + WFL       | 0.833 | 0.6   | 1     | 1     | 0.6 | 0.85  |  | 52 | ~ DBA + WFL       | 0.833 | 0.65  | 0.972 | 0.833 | 0.8 | 0.821 |  | 1     |
| 53 | ~ DBA + WGA       | 0.933 | 0.783 | 1     | 0.833 | 0.9 | 0.858 |  | 53 | ~ DBA + WGA       | 0.933 | 0.817 | 1     | 1     | 0.7 | 0.893 |  | 1     |
| 54 | ~ DBA + RPL-Fuc1  | 0.783 | 0.5   | 1     | 1     | 0.7 | 0.888 |  | 54 | ~ DBA + RPL-Fuc1  | 0.817 | 0.611 | 0.972 | 0.778 | 0.8 | 0.786 |  | 0.958 |
| 55 | ~ DBA + RPL-Sia2  | 0.817 | 0.567 | 1     | 1     | 0.8 | 0.925 |  | 55 | ~ DBA + RPL-Sia2  | 0.833 | 0.644 | 0.978 | 0.944 | 0.7 | 0.857 |  | 0.981 |
| 56 | ~ DBA + P sel     | 0.783 | 0.533 | 0.983 | 1     | 0.6 | 0.85  |  | 56 | ~ DBA + P sel     | 0.833 | 0.633 | 1     | 0.944 | 0.8 | 0.893 |  | 0.94  |
| 57 | ~ DBA + HL sel    | 0.833 | 0.6   | 1     | 1     | 0.7 | 0.888 |  | 57 | ~ DBA + HL sel    | 0.906 | 0.756 | 1     | 0.944 | 0.8 | 0.893 |  | 0.919 |
| 58 | ~ DBA + HE sel    | 0.767 | 0.5   | 0.983 | 0.833 | 0.7 | 0.783 |  | 58 | ~ DBA + HE sel    | 0.872 | 0.728 | 0.978 | 0.722 | 1   | 0.821 |  | 0.88  |
| 59 | ~ HPyL + MAA      | 0.8   | 0.55  | 0.983 | 1     | 0.5 | 0.813 |  | 59 | ~ HPyL + MAA      | 0.756 | 0.55  | 0.922 | 0.722 | 0.8 | 0.75  |  | 1.058 |
| 60 | ~ HPyL + PHAE     | 0.767 | 0.483 | 0.983 | 0.833 | 0.7 | 0.783 |  | 60 | ~ HPyL + PHAE     | 0.961 | 0.883 | 1     | 0.833 | 1   | 0.893 |  | 0.798 |
| 61 | ~ HPyL + PHAL     | 0.483 | 0.183 | 0.783 | 0.667 | 0.5 | 0.604 |  | 61 | ~ HPyL + PHAL     | 0.711 | 0.494 | 0.911 | 0.556 | 0.9 | 0.679 |  | 0.679 |
| 62 | ~ HPyL + RCA I    | 0.7   | 0.4   | 0.933 | 0.667 | 0.8 | 0.717 |  | 62 | ~ HPyL + RCA I    | 0.822 | 0.628 | 0.967 | 0.944 | 0.6 | 0.821 |  | 0.852 |
| 63 | ~ HPyL + SNA I    | 0.95  | 0.817 | 1     | 1     | 0.8 | 0.925 |  | 63 | ~ HPyL + SNA I    | 0.717 | 0.517 | 0.906 | 0.556 | 0.9 | 0.679 |  | 1.325 |
| 64 | ~ HPyL + WFL      | 0.9   | 0.7   | 1     | 0.833 | 0.9 | 0.858 |  | 64 | ~ HPyL + WFL      | 0.717 | 0.478 | 0.922 | 0.667 | 0.8 | 0.714 |  | 1.255 |
| 65 | ~ HPyL + WGA      | 0.983 | 0.9   | 1     | 1     | 0.9 | 0.963 |  | 65 | ~ HPyL + WGA      | 0.906 | 0.761 | 1     | 0.833 | 0.9 | 0.857 |  | 1.085 |
| 66 | ~ HPyL + RPL-Fuc1 | 0.5   | 0.217 | 0.8   | 0.5   | 0.7 | 0.575 |  | 66 | ~ HPyL + RPL-Fuc1 | 0.767 | 0.567 | 0.944 | 0.778 | 0.8 | 0.786 |  | 0.652 |
| 67 | ~ HPyL + RPL-Sia2 | 0.667 | 0.333 | 0.95  | 0.833 | 0.6 | 0.746 |  | 67 | ~ HPyL + RPL-Sia2 | 0.744 | 0.511 | 0.944 | 0.833 | 0.7 | 0.786 |  | 0.897 |
| 68 | ~ HPyL + P sel    | 0.617 | 0.317 | 0.867 | 1     | 0.4 | 0.775 |  | 68 | ~ HPyL + P sel    | 0.717 | 0.456 | 0.922 | 0.944 | 0.5 | 0.786 |  | 0.861 |
| 69 | ~ HPyL + HL sel   | 0.583 | 0.267 | 0.85  | 0.667 | 0.6 | 0.642 |  | 69 | ~ HPyL + HL sel   | 0.911 | 0.778 | 1     | 1     | 0.7 | 0.893 |  | 0.64  |
| 70 | ~ HPyL + HE sel   | 0.583 | 0.3   | 0.867 | 0.833 | 0.5 | 0.708 |  | 70 | ~ HPyL + HE sel   | 0.822 | 0.628 | 0.967 | 0.722 | 0.9 | 0.786 |  | 0.709 |
| 71 | ~ MAA + PHAE      | 0.85  | 0.617 | 1     | 0.833 | 0.8 | 0.821 |  | 71 | ~ MAA + PHAE      | 0.944 | 0.833 | 1     | 0.944 | 0.9 | 0.929 |  | 0.9   |

|     |                    |       |       |       |       |     |       |  |     |                    |       |       |       |       |     |       |  |       |
|-----|--------------------|-------|-------|-------|-------|-----|-------|--|-----|--------------------|-------|-------|-------|-------|-----|-------|--|-------|
| 72  | ~ MAA + PHAL       | 0.817 | 0.567 | 1     | 1     | 0.7 | 0.888 |  | 72  | ~ MAA + PHAL       | 0.733 | 0.539 | 0.9   | 0.556 | 1   | 0.714 |  | 1.115 |
| 73  | ~ MAA + RCA I      | 0.8   | 0.517 | 0.967 | 1     | 0.6 | 0.85  |  | 73  | ~ MAA + RCA I      | 0.839 | 0.661 | 0.978 | 1     | 0.6 | 0.857 |  | 0.954 |
| 74  | ~ MAA + SNA I      | 0.95  | 0.8   | 1     | 0.833 | 1   | 0.896 |  | 74  | ~ MAA + SNA I      | 0.811 | 0.633 | 0.956 | 0.667 | 1   | 0.786 |  | 1.171 |
| 75  | ~ MAA + WFL        | 0.883 | 0.6   | 1     | 0.833 | 1   | 0.896 |  | 75  | ~ MAA + WFL        | 0.733 | 0.544 | 0.894 | 0.5   | 1   | 0.679 |  | 1.205 |
| 76  | ~ MAA + WGA        | 0.867 | 0.667 | 1     | 1     | 0.8 | 0.925 |  | 76  | ~ MAA + WGA        | 0.917 | 0.772 | 1     | 1     | 0.8 | 0.929 |  | 0.945 |
| 77  | ~ MAA + RPL-Fuc1   | 0.767 | 0.5   | 0.967 | 1     | 0.5 | 0.813 |  | 77  | ~ MAA + RPL-Fuc1   | 0.761 | 0.567 | 0.922 | 0.667 | 0.9 | 0.75  |  | 1.008 |
| 78  | ~ MAA + RPL-Sia2   | 0.783 | 0.5   | 0.967 | 1     | 0.5 | 0.813 |  | 78  | ~ MAA + RPL-Sia2   | 0.728 | 0.5   | 0.911 | 0.778 | 0.7 | 0.75  |  | 1.076 |
| 79  | ~ MAA + P sel      | 0.917 | 0.733 | 1     | 1     | 0.8 | 0.925 |  | 79  | ~ MAA + P sel      | 0.75  | 0.544 | 0.917 | 0.778 | 0.7 | 0.75  |  | 1.223 |
| 80  | ~ MAA + HL sel     | 0.75  | 0.467 | 0.967 | 0.833 | 0.6 | 0.746 |  | 80  | ~ MAA + HL sel     | 0.906 | 0.756 | 1     | 1     | 0.7 | 0.893 |  | 0.828 |
| 81  | ~ MAA + HE sel     | 0.833 | 0.583 | 0.983 | 1     | 0.6 | 0.85  |  | 81  | ~ MAA + HE sel     | 0.817 | 0.628 | 0.972 | 0.722 | 0.9 | 0.786 |  | 1.02  |
| 82  | ~ PHAE + PHAL      | 0.667 | 0.333 | 1     | 0.5   | 1   | 0.688 |  | 82  | ~ PHAE + PHAL      | 0.944 | 0.844 | 1     | 0.778 | 1   | 0.857 |  | 0.707 |
| 83  | ~ PHAE + RCA I     | 0.683 | 0.4   | 0.917 | 1     | 0.4 | 0.775 |  | 83  | ~ PHAE + RCA I     | 0.95  | 0.856 | 1     | 0.944 | 0.9 | 0.929 |  | 0.719 |
| 84  | ~ PHAE + SNA I     | 1     | 1     | 1     | 1     | 1   | 1     |  | 84  | ~ PHAE + SNA I     | 0.978 | 0.911 | 1     | 1     | 0.9 | 0.964 |  | 1.022 |
| 85  | ~ PHAE + WFL       | 0.817 | 0.483 | 1     | 0.833 | 0.9 | 0.858 |  | 85  | ~ PHAE + WFL       | 0.95  | 0.85  | 1     | 0.944 | 0.9 | 0.929 |  | 0.86  |
| 86  | ~ PHAE + WGA       | 0.883 | 0.667 | 1     | 0.833 | 0.9 | 0.858 |  | 86  | ~ PHAE + WGA       | 0.95  | 0.833 | 1     | 0.944 | 0.9 | 0.929 |  | 0.929 |
| 87  | ~ PHAE + RPL-Fuc1  | 0.767 | 0.467 | 0.983 | 0.667 | 0.8 | 0.717 |  | 87  | ~ PHAE + RPL-Fuc1  | 0.956 | 0.867 | 1     | 0.889 | 0.9 | 0.893 |  | 0.802 |
| 88  | ~ PHAE + RPL-Sia2  | 0.633 | 0.3   | 0.95  | 0.5   | 1   | 0.688 |  | 88  | ~ PHAE + RPL-Sia2  | 0.939 | 0.828 | 1     | 0.833 | 1   | 0.893 |  | 0.674 |
| 89  | ~ PHAE + P sel     | 0.667 | 0.333 | 0.95  | 0.667 | 0.8 | 0.717 |  | 89  | ~ PHAE + P sel     | 0.956 | 0.861 | 1     | 0.944 | 0.9 | 0.929 |  | 0.698 |
| 90  | ~ PHAE + HL sel    | 0.733 | 0.466 | 0.967 | 0.667 | 0.8 | 0.717 |  | 90  | ~ PHAE + HL sel    | 0.989 | 0.95  | 1     | 1     | 0.9 | 0.964 |  | 0.741 |
| 91  | ~ PHAE + HE sel    | 0.7   | 0.383 | 0.95  | 0.667 | 0.8 | 0.717 |  | 91  | ~ PHAE + HE sel    | 0.939 | 0.833 | 1     | 0.944 | 0.9 | 0.929 |  | 0.745 |
| 92  | ~ PHAL + RCA I     | 0.7   | 0.4   | 0.933 | 1     | 0.4 | 0.775 |  | 92  | ~ PHAL + RCA I     | 0.85  | 0.689 | 0.972 | 0.833 | 0.8 | 0.821 |  | 0.824 |
| 93  | ~ PHAL + SNA I     | 0.95  | 0.8   | 1     | 1     | 0.8 | 0.925 |  | 93  | ~ PHAL + SNA I     | 0.744 | 0.544 | 0.928 | 0.778 | 0.8 | 0.786 |  | 1.277 |
| 94  | ~ PHAL + WFL       | 0.917 | 0.733 | 1     | 0.833 | 0.9 | 0.858 |  | 94  | ~ PHAL + WFL       | 0.544 | 0.317 | 0.756 | 0.278 | 1   | 0.536 |  | 1.686 |
| 95  | ~ PHAL + WGA       | 0.9   | 0.717 | 1     | 0.833 | 0.9 | 0.858 |  | 95  | ~ PHAL + WGA       | 0.922 | 0.778 | 1     | 0.889 | 0.9 | 0.893 |  | 0.976 |
| 96  | ~ PHAL + RPL-Fuc1  | 0.517 | 0.217 | 0.833 | 0.667 | 0.6 | 0.642 |  | 96  | ~ PHAL + RPL-Fuc1  | 0.706 | 0.5   | 0.878 | 0.5   | 1   | 0.679 |  | 0.732 |
| 97  | ~ PHAL + RPL-Sia2  | 0.633 | 0.333 | 0.9   | 0.667 | 0.7 | 0.679 |  | 97  | ~ PHAL + RPL-Sia2  | 0.717 | 0.506 | 0.9   | 0.611 | 0.8 | 0.679 |  | 0.883 |
| 98  | ~ PHAL + P sel     | 0.617 | 0.317 | 0.884 | 0.833 | 0.6 | 0.746 |  | 98  | ~ PHAL + P sel     | 0.633 | 0.372 | 0.856 | 0.778 | 0.6 | 0.714 |  | 0.975 |
| 99  | ~ PHAL + HL sel    | 0.6   | 0.3   | 0.9   | 0.667 | 0.7 | 0.679 |  | 99  | ~ PHAL + HL sel    | 0.894 | 0.761 | 0.994 | 0.944 | 0.7 | 0.857 |  | 0.671 |
| 100 | ~ PHAL + HE sel    | 0.683 | 0.4   | 0.917 | 1     | 0.5 | 0.813 |  | 100 | ~ PHAL + HE sel    | 0.828 | 0.644 | 0.978 | 0.722 | 0.9 | 0.786 |  | 0.825 |
| 101 | ~ RCA I + SNA I    | 0.983 | 0.9   | 1     | 1     | 0.9 | 0.963 |  | 101 | ~ RCA I + SNA I    | 0.906 | 0.778 | 0.994 | 0.833 | 0.9 | 0.857 |  | 1.085 |
| 102 | ~ RCA I + WFL      | 0.75  | 0.433 | 0.967 | 0.5   | 1   | 0.688 |  | 102 | ~ RCA I + WFL      | 0.811 | 0.6   | 0.967 | 0.944 | 0.6 | 0.821 |  | 0.925 |
| 103 | ~ RCA I + WGA      | 0.883 | 0.667 | 1     | 1     | 0.8 | 0.925 |  | 103 | ~ RCA I + WGA      | 0.894 | 0.739 | 1     | 1     | 0.8 | 0.929 |  | 0.988 |
| 104 | ~ RCA I + RPL-Fuc1 | 0.733 | 0.45  | 1     | 0.833 | 0.8 | 0.821 |  | 104 | ~ RCA I + RPL-Fuc1 | 0.85  | 0.683 | 0.967 | 0.833 | 0.8 | 0.821 |  | 0.862 |
| 105 | ~ RCA I + RPL-Sia2 | 0.7   | 0.417 | 0.933 | 0.667 | 0.8 | 0.717 |  | 105 | ~ RCA I + RPL-Sia2 | 0.817 | 0.617 | 0.967 | 0.833 | 0.8 | 0.821 |  | 0.857 |
| 106 | ~ RCA I + P sel    | 0.817 | 0.533 | 1     | 0.833 | 0.8 | 0.821 |  | 106 | ~ RCA I + P sel    | 0.85  | 0.678 | 1     | 1     | 0.7 | 0.893 |  | 0.961 |
| 107 | ~ RCA I + HL sel   | 0.717 | 0.417 | 0.933 | 1     | 0.4 | 0.775 |  | 107 | ~ RCA I + HL sel   | 0.961 | 0.883 | 1     | 1     | 0.8 | 0.929 |  | 0.746 |

|     |                       |       |       |       |       |     |       |  |     |                       |       |       |       |       |     |       |  |       |
|-----|-----------------------|-------|-------|-------|-------|-----|-------|--|-----|-----------------------|-------|-------|-------|-------|-----|-------|--|-------|
| 108 | ~ RCA I + HE sel      | 0.633 | 0.333 | 0.883 | 1     | 0.5 | 0.813 |  | 108 | ~ RCA I + HE sel      | 0.9   | 0.75  | 1     | 0.944 | 0.8 | 0.893 |  | 0.703 |
| 109 | ~ SNA I + WFL         | 1     | 1     | 1     | 1     | 1   | 1     |  | 109 | ~ SNA I + WFL         | 0.778 | 0.594 | 0.939 | 0.611 | 1   | 0.75  |  | 1.285 |
| 110 | ~ SNA I + WGA         | 1     | 1     | 1     | 1     | 1   | 1     |  | 110 | ~ SNA I + WGA         | 0.906 | 0.744 | 1     | 0.944 | 0.8 | 0.893 |  | 1.104 |
| 111 | ~ SNA I + RPL-Fuc1    | 0.967 | 0.867 | 1     | 0.833 | 1   | 0.896 |  | 111 | ~ SNA I + RPL-Fuc1    | 0.733 | 0.544 | 0.894 | 0.556 | 1   | 0.714 |  | 1.319 |
| 112 | ~ SNA I + RPL-Sia2    | 0.95  | 0.8   | 1     | 0.833 | 1   | 0.896 |  | 112 | ~ SNA I + RPL-Sia2    | 0.756 | 0.55  | 0.922 | 0.778 | 0.8 | 0.786 |  | 1.257 |
| 113 | ~ SNA I + P sel       | 0.95  | 0.8   | 1     | 1     | 0.8 | 0.925 |  | 113 | ~ SNA I + P sel       | 0.722 | 0.494 | 0.889 | 0.444 | 1   | 0.643 |  | 1.316 |
| 114 | ~ SNA I + HL sel      | 0.983 | 0.9   | 1     | 1     | 0.9 | 0.963 |  | 114 | ~ SNA I + HL sel      | 0.9   | 0.756 | 0.989 | 1     | 0.7 | 0.893 |  | 1.092 |
| 115 | ~ SNA I + HE sel      | 0.933 | 0.75  | 1     | 1     | 0.8 | 0.925 |  | 115 | ~ SNA I + HE sel      | 0.833 | 0.644 | 0.978 | 0.889 | 0.7 | 0.821 |  | 1.12  |
| 116 | ~ WFL + WGA           | 0.9   | 0.717 | 1     | 1     | 0.7 | 0.888 |  | 116 | ~ WFL + WGA           | 0.906 | 0.75  | 1     | 0.944 | 0.8 | 0.893 |  | 0.993 |
| 117 | ~ WFL + RPL-Fuc1      | 0.883 | 0.667 | 1     | 0.833 | 0.9 | 0.858 |  | 117 | ~ WFL + RPL-Fuc1      | 0.717 | 0.511 | 0.883 | 0.667 | 0.8 | 0.714 |  | 1.232 |
| 118 | ~ WFL + RPL-Sia2      | 0.767 | 0.467 | 1     | 0.667 | 0.9 | 0.754 |  | 118 | ~ WFL + RPL-Sia2      | 0.717 | 0.494 | 0.906 | 0.944 | 0.5 | 0.786 |  | 1.07  |
| 119 | ~ WFL + P sel         | 0.783 | 0.5   | 1     | 0.5   | 1   | 0.688 |  | 119 | ~ WFL + P sel         | 0.678 | 0.444 | 0.872 | 0.833 | 0.6 | 0.75  |  | 1.155 |
| 120 | ~ WFL + HL sel        | 0.833 | 0.533 | 1     | 0.833 | 0.9 | 0.858 |  | 120 | ~ WFL + HL sel        | 0.894 | 0.739 | 0.995 | 1     | 0.7 | 0.893 |  | 0.932 |
| 121 | ~ WFL + HE sel        | 0.75  | 0.467 | 0.967 | 0.5   | 1   | 0.688 |  | 121 | ~ WFL + HE sel        | 0.85  | 0.672 | 0.989 | 0.833 | 0.9 | 0.857 |  | 0.882 |
| 122 | ~ WGA + RPL-Fuc1      | 0.867 | 0.667 | 1     | 0.833 | 0.8 | 0.821 |  | 122 | ~ WGA + RPL-Fuc1      | 0.906 | 0.733 | 1     | 0.944 | 0.8 | 0.893 |  | 0.957 |
| 123 | ~ WGA + RPL-Sia2      | 0.85  | 0.6   | 1     | 1     | 0.6 | 0.85  |  | 123 | ~ WGA + RPL-Sia2      | 0.911 | 0.778 | 0.994 | 0.833 | 0.9 | 0.857 |  | 0.933 |
| 124 | ~ WGA + P sel         | 0.85  | 0.6   | 1     | 0.833 | 0.9 | 0.858 |  | 124 | ~ WGA + P sel         | 0.9   | 0.733 | 1     | 1     | 0.8 | 0.929 |  | 0.944 |
| 125 | ~ WGA + HL sel        | 0.883 | 0.683 | 1     | 0.833 | 0.9 | 0.858 |  | 125 | ~ WGA + HL sel        | 0.983 | 0.933 | 1     | 0.944 | 1   | 0.964 |  | 0.898 |
| 126 | ~ WGA + HE sel        | 0.9   | 0.7   | 1     | 0.833 | 0.9 | 0.858 |  | 126 | ~ WGA + HE sel        | 0.922 | 0.778 | 1     | 1     | 0.8 | 0.929 |  | 0.976 |
| 127 | ~ RPL-Fuc1 + RPL-Sia2 | 0.617 | 0.3   | 0.9   | 0.667 | 0.8 | 0.717 |  | 127 | ~ RPL-Fuc1 + RPL-Sia2 | 0.689 | 0.478 | 0.861 | 0.5   | 0.9 | 0.643 |  | 0.896 |
| 128 | ~ RPL-Fuc1 + P sel    | 0.617 | 0.317 | 0.883 | 0.833 | 0.5 | 0.708 |  | 128 | ~ RPL-Fuc1 + P sel    | 0.728 | 0.517 | 0.894 | 0.556 | 0.9 | 0.679 |  | 0.848 |
| 129 | ~ RPL-Fuc1 + HL sel   | 0.633 | 0.333 | 0.884 | 0.833 | 0.5 | 0.708 |  | 129 | ~ RPL-Fuc1 + HL sel   | 0.917 | 0.789 | 1     | 1     | 0.7 | 0.893 |  | 0.69  |
| 130 | ~ RPL-Fuc1 + HE sel   | 0.683 | 0.4   | 0.933 | 0.833 | 0.7 | 0.783 |  | 130 | ~ RPL-Fuc1 + HE sel   | 0.85  | 0.667 | 0.983 | 0.778 | 0.9 | 0.821 |  | 0.804 |
| 131 | ~ RPL-Sia2 + P sel    | 0.667 | 0.383 | 0.9   | 0.833 | 0.5 | 0.708 |  | 131 | ~ RPL-Sia2 + P sel    | 0.672 | 0.439 | 0.861 | 0.833 | 0.5 | 0.714 |  | 0.993 |
| 132 | ~ RPL-Sia2 + HL sel   | 0.617 | 0.283 | 0.883 | 0.833 | 0.5 | 0.708 |  | 132 | ~ RPL-Sia2 + HL sel   | 0.906 | 0.761 | 0.994 | 0.944 | 0.7 | 0.857 |  | 0.681 |
| 133 | ~ RPL-Sia2 + HE sel   | 0.65  | 0.367 | 0.9   | 0.833 | 0.5 | 0.708 |  | 133 | ~ RPL-Sia2 + HE sel   | 0.828 | 0.622 | 0.978 | 0.778 | 0.9 | 0.821 |  | 0.785 |
| 134 | ~ P sel + HL sel      | 0.667 | 0.367 | 0.917 | 1     | 0.4 | 0.775 |  | 134 | ~ P sel + HL sel      | 0.889 | 0.728 | 1     | 1     | 0.7 | 0.893 |  | 0.75  |
| 135 | ~ P sel + HE sel      | 0.75  | 0.467 | 0.967 | 1     | 0.6 | 0.85  |  | 135 | ~ P sel + HE sel      | 0.833 | 0.656 | 0.967 | 0.833 | 0.8 | 0.821 |  | 0.9   |
| 136 | ~ HL sel + HE sel     | 0.6   | 0.3   | 0.867 | 1     | 0.3 | 0.738 |  | 136 | ~ HL sel + HE sel     | 0.922 | 0.8   | 0.994 | 0.833 | 0.9 | 0.857 |  | 0.651 |
